# Supplementary material for: Stable and self-healable LbL coating with antibiofilm efficacy based on alkylated polyethyleneimine micelles
Source: Royal Society of Chemistry journal article supplement (doi:10.1039/c9tb00498j), 2019-01-01
Supplement: c9tb00498j1.pdf [file c9tb00498j1.pdf]

## Supporting Information

### **Stable and Self-healable LbL Coating with Antibiofilm Efficacy Based on Alkylated Polyethyleneimine Micelles**

Qianqian Wang,<sup>a†</sup> Lin Wang,<sup>b†</sup> Lingling Gao,<sup>a</sup> Luofeng Yu,<sup>a</sup> Wei Feng,<sup>a</sup> Nian Liu,<sup>a</sup>  
Miao Xu,<sup>a</sup> Xiaozhou Li,<sup>b</sup> Peng Li<sup>\*a,c</sup>, and Wei Huang<sup>\*a,c</sup>

<sup>a</sup> Key Laboratory of Flexible Electronics (KLOFE) and Institute of Advanced Materials (IAM), Jiangsu National Synergetic Innovation Center for Advanced Materials (SICAM), Nanjing Tech University (Nanjing Tech), Nanjing 211816, China

<sup>b</sup> College of Chemistry & Pharmacy, Northwest A&F University, Yangling 712100, Shaanxi, China

<sup>c</sup> Shaanxi Institute of Flexible Electronics (SIFE) & Xi'an Institute of Biomedical Materials and Engineering (IBME), Northwestern Polytechnical University (NPU), 127 West Youyi Road, Xi'an 710072, China

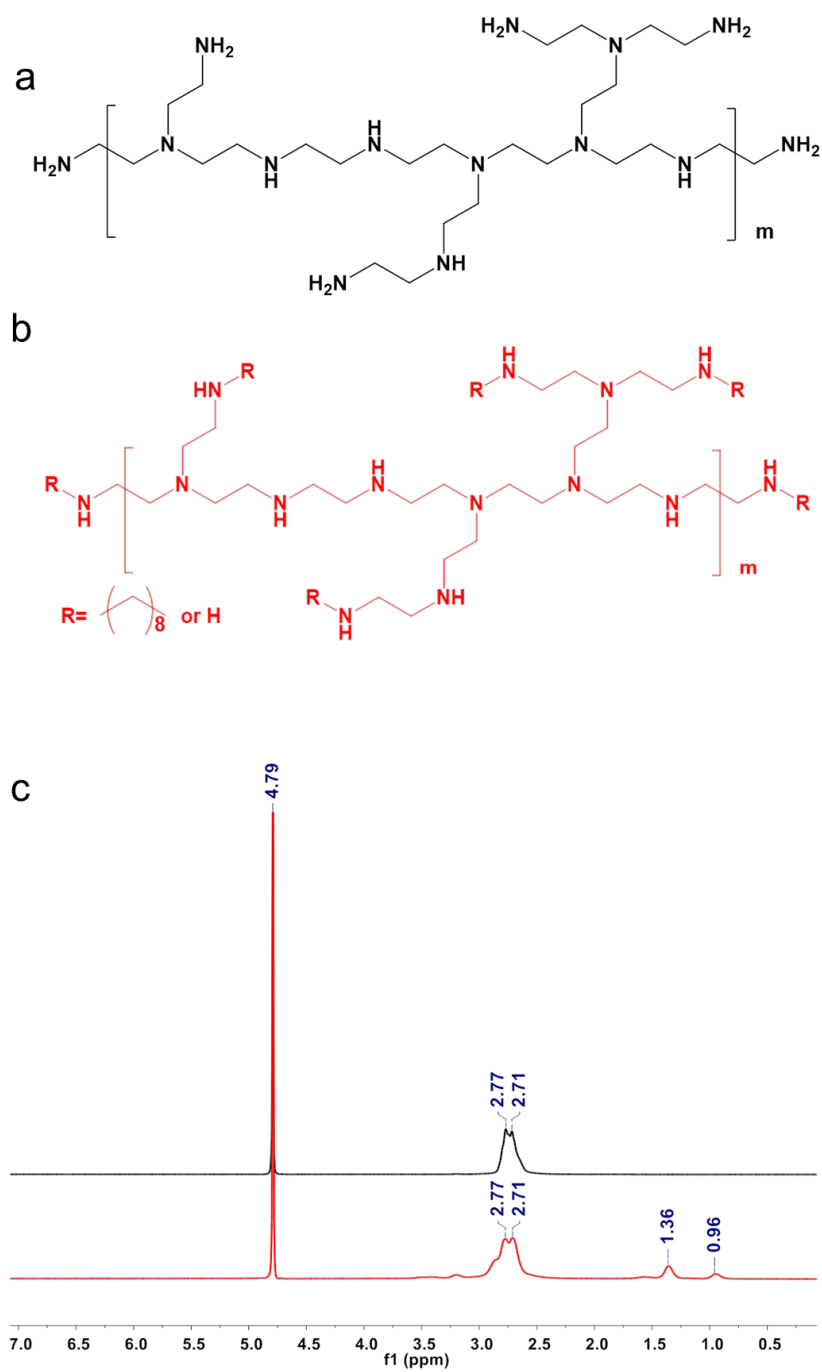

**Figure S1.** Structure of PEI (**a**) and DPEI (**b**),  $^1\text{H}$  NMR of PEI and DPEI (**c**).

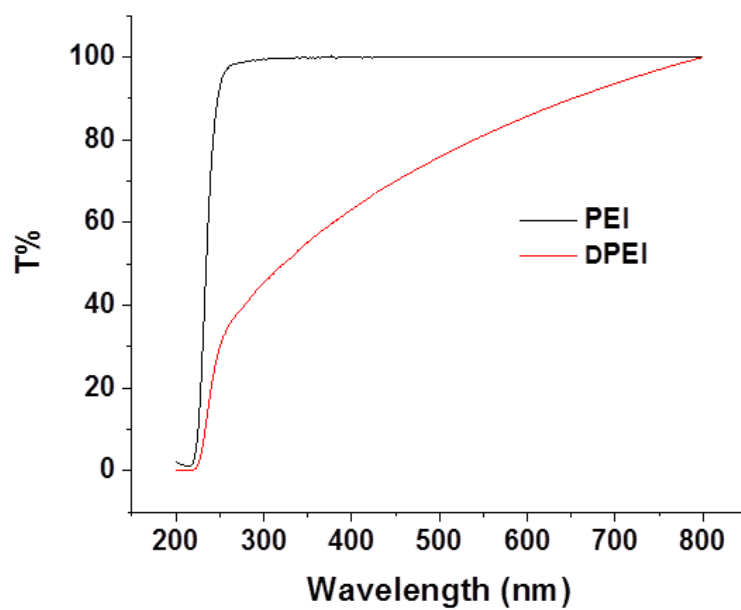

**Figure S2.** UV-vis transmittance spectra of PEI and DPEI solution at the same concentration (1 mg/mL).

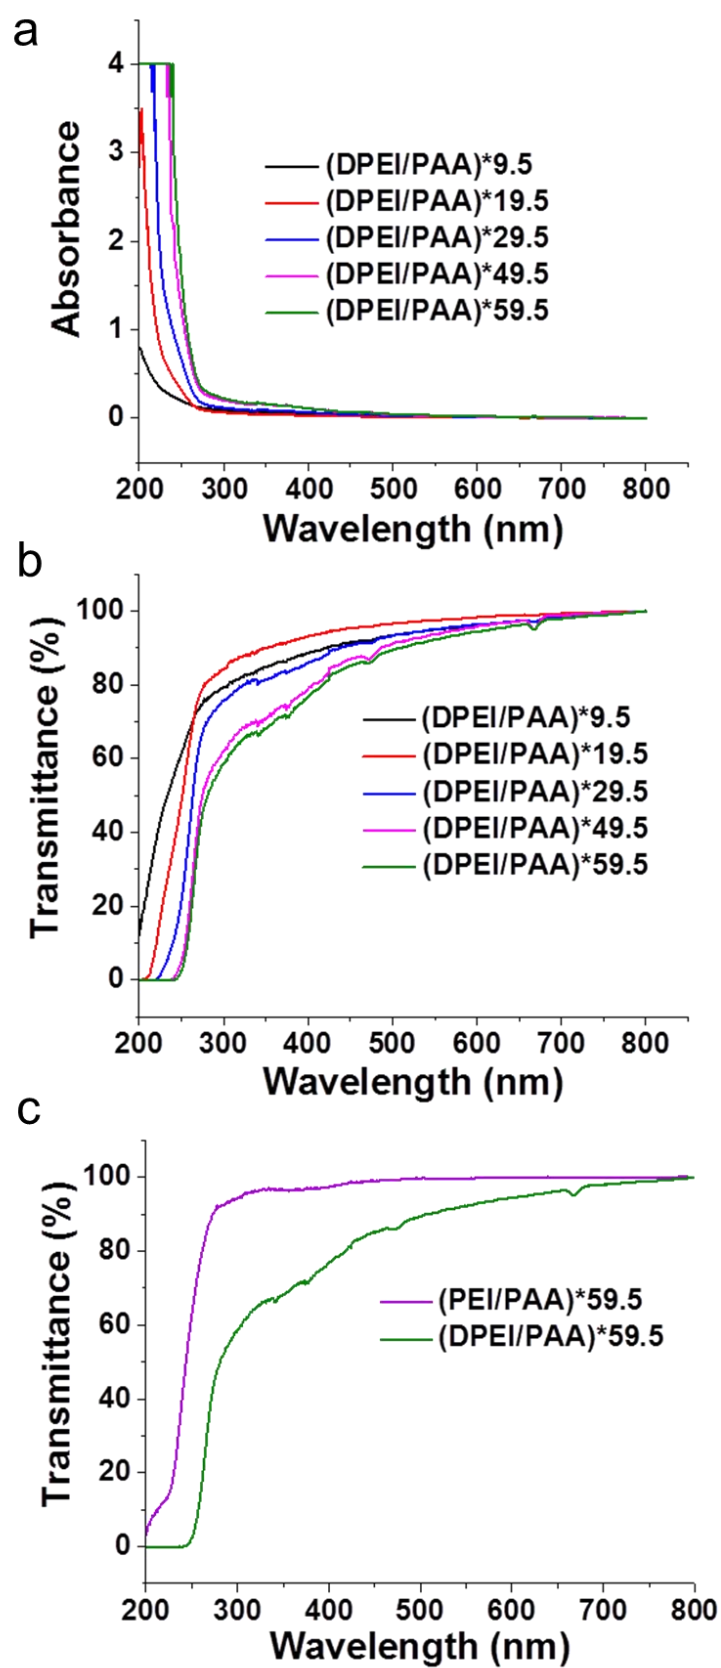

**Figure S3.** UV-vis absorption (a) and transmission spectra (b) of (DPEI/PAA)\*n, the transmission spectra of (DPEI/PAA)\*59.5 and (PEI/PAA)\*59.5 (c).

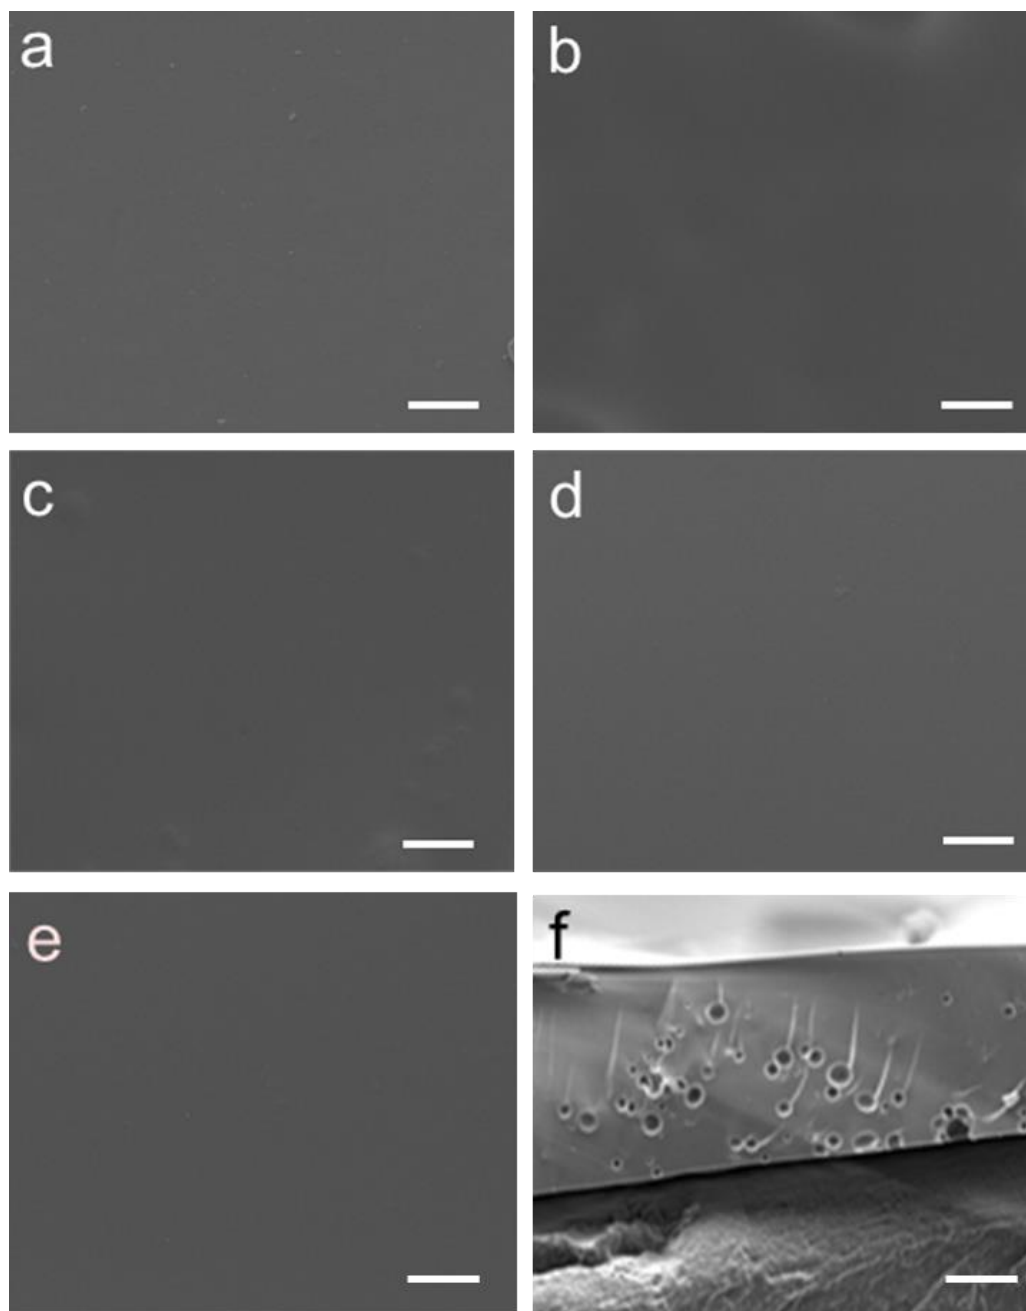

**Figure S4.** Surface topography of blank silicone (**a**), (DPEI/PAA)\*59.5 (**b**), (DPEI/PAA)\*60 (**c**), (PEI/PAA)\*59.5 (**d**), and (PEI/PAA)\*60 coatings (**e**), and the thickness of (DPEI/PAA)\*59.5 coating (**f**). The scale bar is 10  $\mu\text{m}$ .

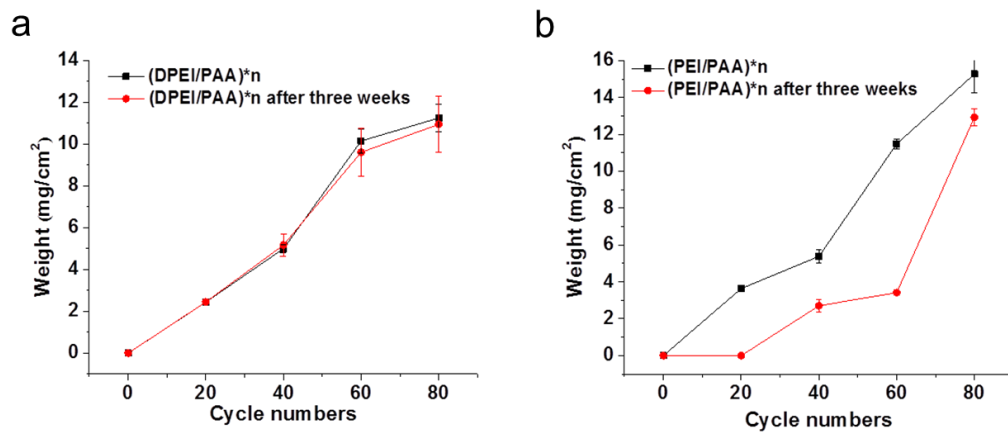

**Figure S5.** The weight changes of LbL assembled coatings with increasing cycle numbers of (DPEI/PAA)\*n coating **(a)** and (PEI/PAA)\*n coating **(b)**.
